# Supplementary material for: Synthesis and Characterization of Some New Coumarins with in Vitro Antitumor and Antioxidant Activity and High Protective Effects against DNA Damage
Source: PubMed Central journal article supplement (PMC6274385; doi:10.3390/molecules21020249), 2016-02-22
Supplement: molecules-21-00249-s001.pdf [file molecules-21-00249-s001.pdf]

# Supplementary Materials: Synthesis and Characterization of Some New Coumarins with *In Vitro* Antitumor and Antioxidant Activity and High Protective Effects against DNA Damage

Mounir A. I. Salem <sup>1,†</sup>, Magda I. Marzouk <sup>1,†,\*</sup> and Azza M. El-Kazak <sup>2,†</sup>

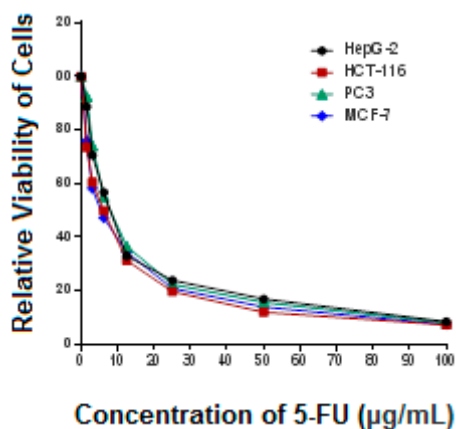

Figure S1. Relative viability of cells (%) against concentration of 5-FU.

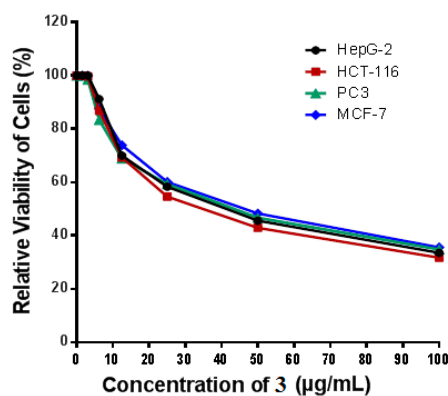

Figure S2. Relative viability of cells (%) against concentration of compound 3.

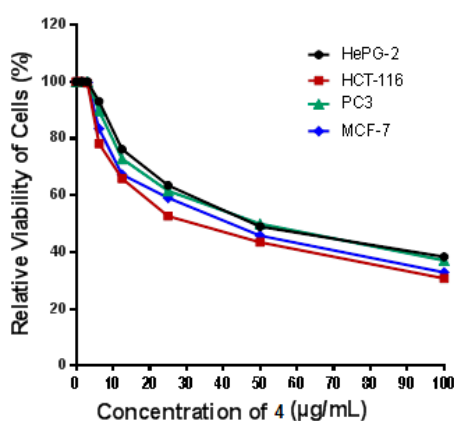

Figure S3. Relative viability of cells (%) against concentration of compound 4.

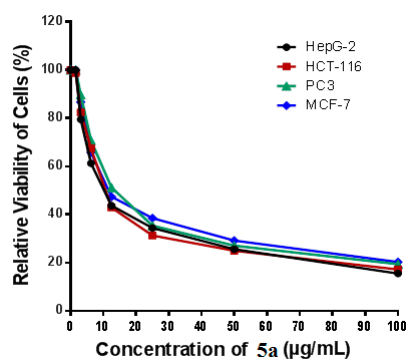

Figure S4. Relative viability of cells (%) against concentration of compound 5a.

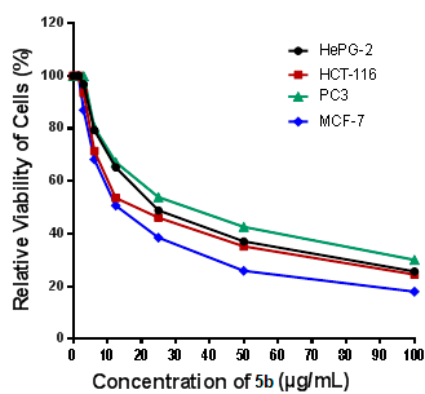

Figure S5. Relative viability of cells (%) against concentration of compound 5b.

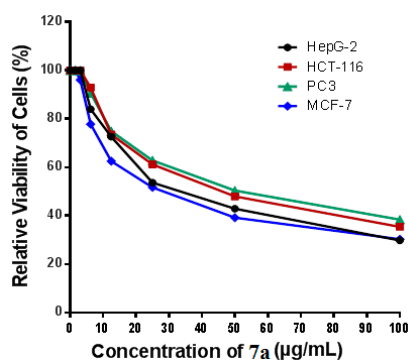

Figure S6. Relative viability of cells (%) against concentration of compound 7a.

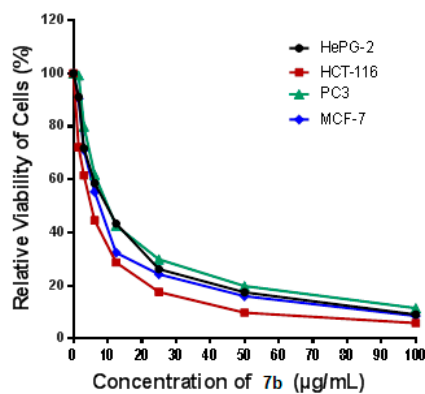

Figure S7. Relative viability of cells (%) against concentration of compound 7b.

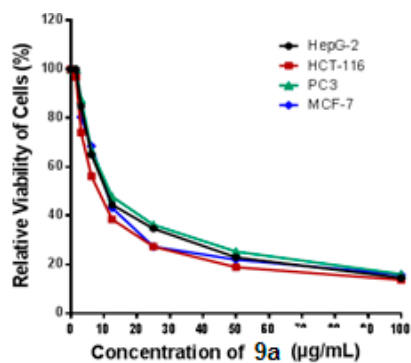

Figure S8. Relative viability of cells (%) against concentration of compound 9a.

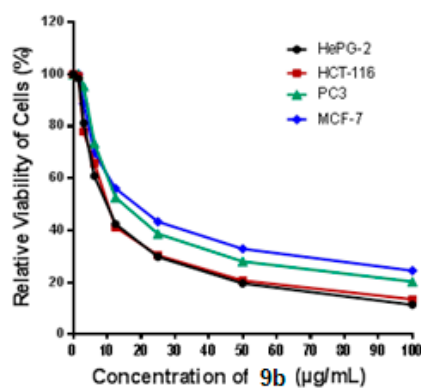

Figure S9. Relative viability of cells (%) against concentration of compound 9b.

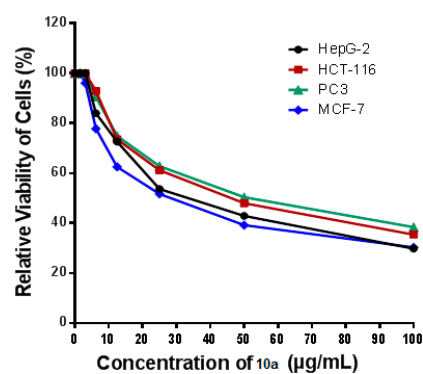

Figure S10. Relative viability of cells (%) against concentration of compound 10a.

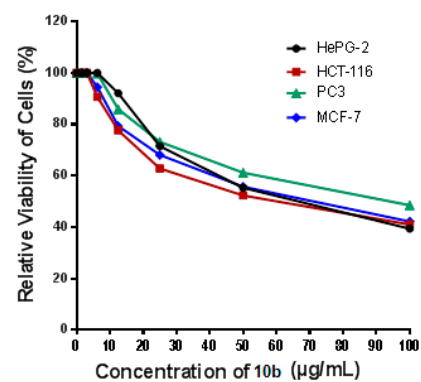

Figure S11. Relative viability of cells (%) against concentration of compound 10b.

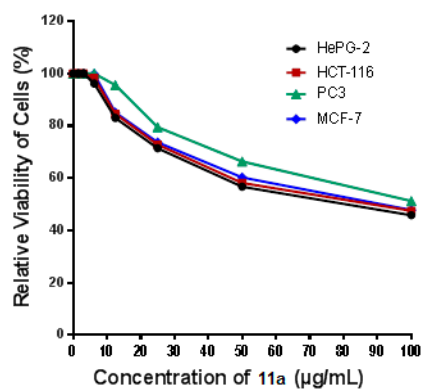

Figure S12. Relative viability of cells (%) against concentration of compound 11a.

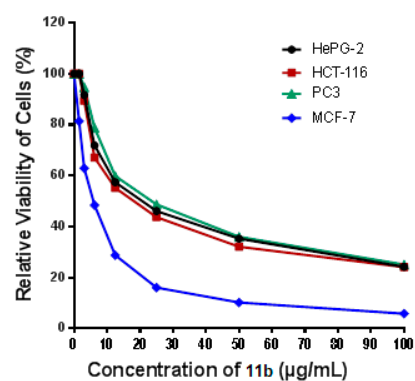

Figure S13. Relative viability of cells (%) against concentration of compound 11b.

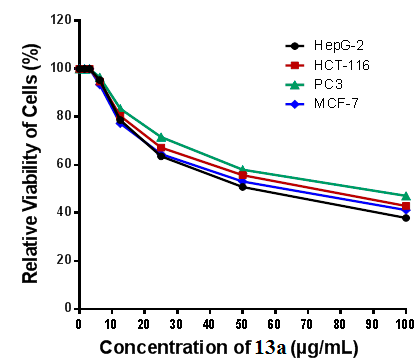

Figure S14. Relative viability of cells (%) against concentration of compound 13a.

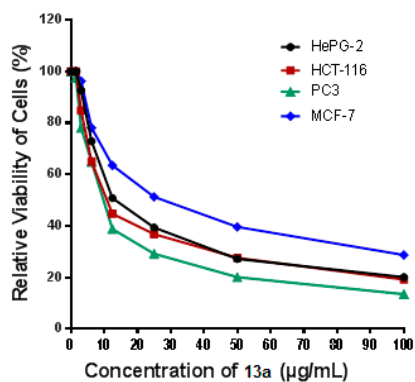

Figure S15. Relative viability of cells (%) against concentration of compound 13b.

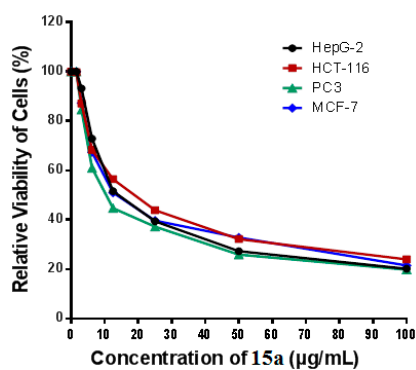

Figure S16. Relative viability of cells (%) against concentration of compound 15a.

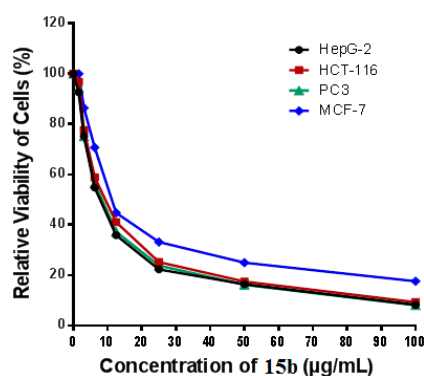

Figure S17. Relative viability of cells (%) against concentration of compound 15b.

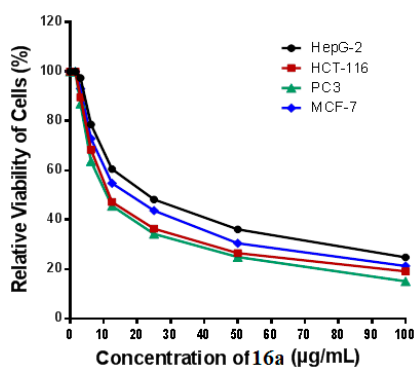

Figure S18. Relative viability of cells (%) against concentration of compound 16a.

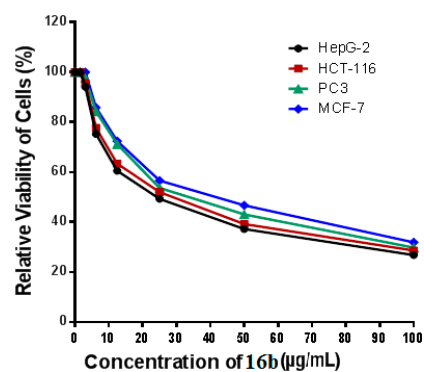

Figure S19. Relative viability of cells (%) against concentration of compound 16b.

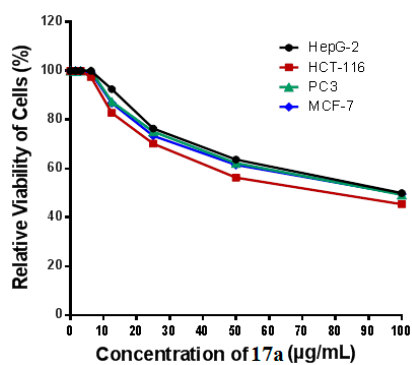

Figure S20. Relative viability of cells (%) against concentration of compound 17a.

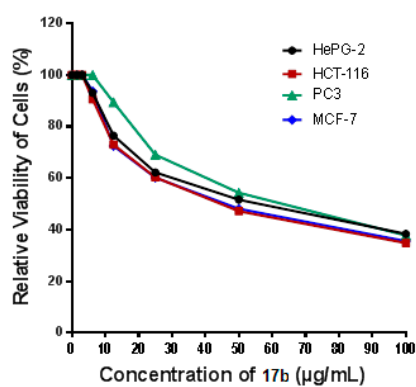

Figure S21. Relative viability of cells (%) against concentration of compound 17b.

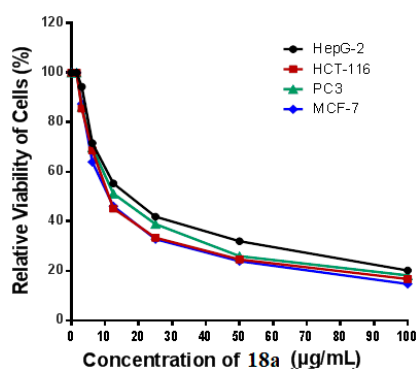

Figure S22. Relative viability of cells (%) against concentration of compound 18a.

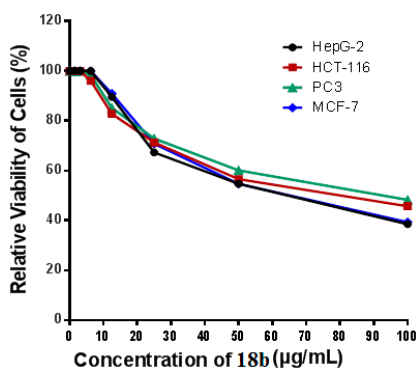

Figure S23. Relative viability of cells (%) against concentration of compound 18b.

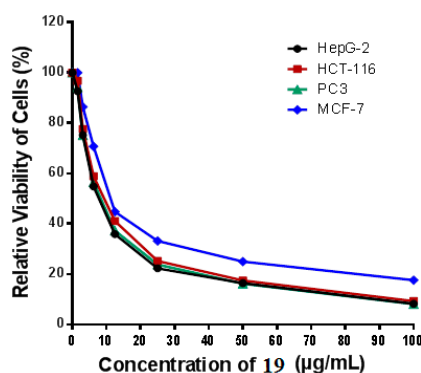

Figure S24. Relative viability of cells (%) against concentration of compound 19.

Table S1. Relative viability of cells (%) for 5-FU and compounds 3, 4, 5a,b, 7a,b and (9–10)a,b.

| Compounds | Conc. (µg/mL) | HepG-2 | HCT-116 | PC3  | MCF-7 |
|-----------|---------------|--------|---------|------|-------|
| 5-FU      | 100 µg/mL     | 8.6    | 7.4     | 8.1  | 7.6   |
|           | 50 µg/mL      | 17.1   | 12.1    | 15.8 | 14.1  |
|           | 25 µg/mL      | 24.0   | 19.8    | 22.5 | 21.0  |
|           | 12.5 µg/mL    | 33.1   | 31.4    | 36.7 | 34.5  |
|           | 6.25 µg/mL    | 56.8   | 49.9    | 55.2 | 47.3  |
|           | 3.125 µg/mL   | 70.6   | 60.5    | 74.1 | 58.2  |
|           | 1.56 µg/mL    | 88.7   | 73.6    | 92.5 | 76.0  |
| 3         | 100 µg/mL     | 33.5   | 31.7    | 34.8 | 35.6  |
|           | 50 µg/mL      | 45.6   | 42.9    | 46.7 | 48.3  |
|           | 25 µg/mL      | 58.3   | 54.6    | 59.3 | 60.1  |
|           | 12.5 µg/mL    | 70.0   | 69.3    | 68.9 | 73.9  |
|           | 6.25 µg/mL    | 91.2   | 86.8    | 83.4 | 87.6  |
|           | 3.125 µg/mL   | 100    | 99.7    | 98.5 | 100   |
|           | 1.56 µg/mL    | 100    | 100     | 100  | 100   |
| 4         | 100 µg/mL     | 38.4   | 30.8    | 37.1 | 32.9  |
|           | 50 µg/mL      | 49.0   | 43.5    | 50.0 | 45.8  |
|           | 25 µg/mL      | 63.5   | 52.7    | 61.6 | 59.1  |
|           | 12.5 µg/mL    | 76.2   | 65.9    | 72.9 | 67.3  |
|           | 6.25 µg/mL    | 93.1   | 78.2    | 89.8 | 83.4  |
|           | 3.125 µg/mL   | 100    | 99.5    | 100  | 99.7  |
|           | 1.56 µg/mL    | 100    | 100     | 100  | 100   |
| 5a        | 100 µg/mL     | 15.5   | 17.2    | 19.4 | 20.3  |
|           | 50 µg/mL      | 25.6   | 25.0    | 27.1 | 29.2  |
|           | 25 µg/mL      | 34.4   | 31.3    | 35.4 | 38.5  |
|           | 12.5 µg/mL    | 43.7   | 42.9    | 51.2 | 47.4  |
|           | 6.25 µg/mL    | 61.3   | 67.5    | 70.8 | 65.8  |
|           | 3.125 µg/mL   | 79.5   | 82.4    | 89.7 | 86.7  |
|           | 1.56 µg/mL    | 100    | 98.7    | 100  | 100   |
| 5b        | 100 µg/mL     | 25.7   | 24.5    | 30.1 | 18.0  |
|           | 50 µg/mL      | 37.1   | 35.2    | 42.6 | 25.9  |
|           | 25 µg/mL      | 48.9   | 46.1    | 53.9 | 38.5  |
|           | 12.5 µg/mL    | 65.2   | 53.6    | 67.2 | 50.7  |
|           | 6.25 µg/mL    | 79.3   | 71.4    | 80.4 | 68.2  |
|           | 3.125 µg/mL   | 96.8   | 93.5    | 99.9 | 87.0  |
|           | 1.56 µg/mL    | 100    | 100     | 100  | 100   |

Table S1. Cont.

| Compounds  | Conc. ( $\mu\text{g/mL}$ ) | HepG-2 | HCT-116 | PC3  | MCF-7 |
|------------|----------------------------|--------|---------|------|-------|
| <b>7a</b>  | 100 $\mu\text{g/mL}$       | 11.4   | 13.1    | 9.1  | 14.5  |
|            | 50 $\mu\text{g/mL}$        | 18.8   | 18.9    | 16.8 | 20.8  |
|            | 25 $\mu\text{g/mL}$        | 28.7   | 27.0    | 26.3 | 25.4  |
|            | 12.5 $\mu\text{g/mL}$      | 42.1   | 37.4    | 38.9 | 38.9  |
|            | 6.25 $\mu\text{g/mL}$      | 61.5   | 66.9    | 59.6 | 67.7  |
|            | 3.125 $\mu\text{g/mL}$     | 80.2   | 76.6    | 78.2 | 75.0  |
|            | 1.56 $\mu\text{g/mL}$      | 98.3   | 97.2    | 96.7 | 97.3  |
| <b>7b</b>  | 100 $\mu\text{g/mL}$       | 9.1    | 5.9     | 11.5 | 8.6   |
|            | 50 $\mu\text{g/mL}$        | 17.5   | 9.8     | 19.8 | 16.0  |
|            | 25 $\mu\text{g/mL}$        | 26.2   | 17.6    | 29.9 | 24.3  |
|            | 12.5 $\mu\text{g/mL}$      | 43.4   | 28.7    | 42.6 | 32.4  |
|            | 6.25 $\mu\text{g/mL}$      | 58.6   | 44.6    | 61.8 | 55.3  |
|            | 3.125 $\mu\text{g/mL}$     | 71.8   | 61.5    | 80.0 | 71.1  |
|            | 1.56 $\mu\text{g/mL}$      | 91.1   | 72.2    | 99.3 | 90.5  |
| <b>9a</b>  | 100 $\mu\text{g/mL}$       | 14.5   | 13.7    | 16.0 | 15.8  |
|            | 50 $\mu\text{g/mL}$        | 22.9   | 18.9    | 25.3 | 22.0  |
|            | 25 $\mu\text{g/mL}$        | 34.7   | 27.3    | 36.2 | 27.3  |
|            | 12.5 $\mu\text{g/mL}$      | 44.5   | 38.5    | 47.8 | 43.2  |
|            | 6.25 $\mu\text{g/mL}$      | 65.0   | 56.2    | 66.7 | 68.5  |
|            | 3.125 $\mu\text{g/mL}$     | 84.8   | 74.1    | 87.5 | 80.4  |
|            | 1.56 $\mu\text{g/mL}$      | 100    | 96.8    | 100  | 98.6  |
| <b>9b</b>  | 100 $\mu\text{g/mL}$       | 11.4   | 13.5    | 20.3 | 24.5  |
|            | 50 $\mu\text{g/mL}$        | 19.6   | 20.7    | 28.0 | 32.9  |
|            | 25 $\mu\text{g/mL}$        | 29.8   | 30.4    | 38.7 | 43.3  |
|            | 12.5 $\mu\text{g/mL}$      | 42.5   | 41.2    | 52.6 | 56.1  |
|            | 6.25 $\mu\text{g/mL}$      | 60.9   | 65.8    | 73.5 | 69.7  |
|            | 3.125 $\mu\text{g/mL}$     | 81.2   | 78.0    | 95.4 | 88.6  |
|            | 1.56 $\mu\text{g/mL}$      | 98.3   | 99.1    | 100  | 100   |
| <b>10a</b> | 100 $\mu\text{g/mL}$       | 29.8   | 35.4    | 38.4 | 30.3  |
|            | 50 $\mu\text{g/mL}$        | 42.9   | 48.0    | 50.4 | 39.2  |
|            | 25 $\mu\text{g/mL}$        | 53.7   | 61.2    | 62.8 | 51.7  |
|            | 12.5 $\mu\text{g/mL}$      | 72.6   | 73.5    | 74.9 | 62.5  |
|            | 6.25 $\mu\text{g/mL}$      | 84.0   | 92.9    | 90.7 | 77.8  |
|            | 3.125 $\mu\text{g/mL}$     | 100    | 100     | 100  | 96.1  |
|            | 1.56 $\mu\text{g/mL}$      | 100    | 100     | 100  | 100   |
| <b>10b</b> | 100 $\mu\text{g/mL}$       | 39.4   | 41.0    | 48.5 | 42.2  |
|            | 50 $\mu\text{g/mL}$        | 55.3   | 52.3    | 61.2 | 55.7  |
|            | 25 $\mu\text{g/mL}$        | 71.5   | 62.8    | 73.2 | 68.1  |
|            | 12.5 $\mu\text{g/mL}$      | 92.1   | 77.6    | 85.9 | 79.3  |
|            | 6.25 $\mu\text{g/mL}$      | 100    | 90.7    | 99.7 | 94.5  |
|            | 3.125 $\mu\text{g/mL}$     | 100    | 100     | 100  | 100   |
|            | 1.56 $\mu\text{g/mL}$      | 100    | 100     | 100  | 100   |



**Table S2.** Relative viability of cells (%) for 5-FU and compounds **11a,b**, **13a,b** (**15–18**)**a,b** and **19**.

| Compounds  | Conc. ( $\mu\text{g/mL}$ ) | HepG-2 | HCT-116 | PC3  | MCF-7 |
|------------|----------------------------|--------|---------|------|-------|
| <b>11a</b> | 100 $\mu\text{g/mL}$       | 45.8   | 47.5    | 51.3 | 47.8  |
|            | 50 $\mu\text{g/mL}$        | 56.7   | 58.2    | 66.4 | 60.3  |
|            | 25 $\mu\text{g/mL}$        | 71.4   | 72.8    | 79.5 | 73.7  |
|            | 12.5 $\mu\text{g/mL}$      | 83.0   | 84.6    | 95.6 | 85.1  |
|            | 6.25 $\mu\text{g/mL}$      | 96.2   | 98.3    | 100  | 99.8  |
|            | 3.125 $\mu\text{g/mL}$     | 100    | 100     | 100  | 100   |
|            | 1.56 $\mu\text{g/mL}$      | 100    | 100     | 100  | 100   |
|            | 1.56 $\mu\text{g/mL}$      | 45.8   | 47.5    | 51.3 | 47.8  |
| <b>11b</b> | 100 $\mu\text{g/mL}$       | 24.2   | 24.1    | 25.1 | 5.8   |
|            | 50 $\mu\text{g/mL}$        | 35.3   | 32.1    | 36.0 | 10.2  |
|            | 25 $\mu\text{g/mL}$        | 46.1   | 43.7    | 48.7 | 16.1  |
|            | 12.5 $\mu\text{g/mL}$      | 57.4   | 55.2    | 59.9 | 28.8  |
|            | 6.25 $\mu\text{g/mL}$      | 71.9   | 67.1    | 78.8 | 48.4  |
|            | 3.125 $\mu\text{g/mL}$     | 91.7   | 89.4    | 94.7 | 62.9  |
|            | 1.56 $\mu\text{g/mL}$      | 100    | 100     | 100  | 81.4  |
|            | 1.56 $\mu\text{g/mL}$      | 24.2   | 24.1    | 25.1 | 5.8   |
| <b>13a</b> | 100 $\mu\text{g/mL}$       | 37.9   | 42.9    | 47.1 | 41.2  |
|            | 50 $\mu\text{g/mL}$        | 50.8   | 55.7    | 58.0 | 53.1  |
|            | 25 $\mu\text{g/mL}$        | 63.6   | 67.2    | 71.6 | 64.5  |
|            | 12.5 $\mu\text{g/mL}$      | 78.7   | 80.4    | 83.4 | 77.3  |
|            | 6.25 $\mu\text{g/mL}$      | 95.3   | 94.7    | 96.5 | 93.4  |
|            | 3.125 $\mu\text{g/mL}$     | 100    | 100     | 100  | 100   |
|            | 1.56 $\mu\text{g/mL}$      | 100    | 100     | 100  | 100   |
|            | 1.56 $\mu\text{g/mL}$      | 37.9   | 42.9    | 47.1 | 41.2  |
| <b>13b</b> | 100 $\mu\text{g/mL}$       | 20.1   | 19.2    | 13.5 | 28.7  |
|            | 50 $\mu\text{g/mL}$        | 27.2   | 27.6    | 20.1 | 39.6  |
|            | 25 $\mu\text{g/mL}$        | 39.4   | 36.8    | 29.2 | 51.3  |
|            | 12.5 $\mu\text{g/mL}$      | 50.8   | 44.7    | 38.8 | 63.5  |
|            | 6.25 $\mu\text{g/mL}$      | 72.9   | 65.0    | 64.9 | 78.1  |
|            | 3.125 $\mu\text{g/mL}$     | 92.7   | 84.8    | 78.1 | 96.2  |
|            | 1.56 $\mu\text{g/mL}$      | 100    | 100     | 97.6 | 100   |
|            | 1.56 $\mu\text{g/mL}$      | 20.1   | 19.2    | 13.5 | 28.7  |
| <b>15a</b> | 100 $\mu\text{g/mL}$       | 20.2   | 24.0    | 19.8 | 21.5  |
|            | 50 $\mu\text{g/mL}$        | 27.3   | 32.2    | 25.9 | 32.8  |
|            | 25 $\mu\text{g/mL}$        | 39.4   | 43.9    | 37.2 | 39.7  |
|            | 12.5 $\mu\text{g/mL}$      | 51.6   | 56.4    | 44.7 | 51.0  |
|            | 6.25 $\mu\text{g/mL}$      | 72.9   | 68.3    | 61.0 | 67.4  |
|            | 3.125 $\mu\text{g/mL}$     | 93.2   | 87.1    | 84.6 | 87.3  |
|            | 1.56 $\mu\text{g/mL}$      | 100    | 99.8    | 100  | 100   |
|            | 1.56 $\mu\text{g/mL}$      | 20.2   | 24.0    | 19.8 | 21.5  |
| <b>15b</b> | 100 $\mu\text{g/mL}$       | 8.2    | 9.3     | 8.1  | 17.6  |
|            | 50 $\mu\text{g/mL}$        | 16.4   | 17.5    | 16.2 | 25.0  |
|            | 25 $\mu\text{g/mL}$        | 22.3   | 25.2    | 23.8 | 33.2  |
|            | 12.5 $\mu\text{g/mL}$      | 35.9   | 41.1    | 37.3 | 44.8  |
|            | 6.25 $\mu\text{g/mL}$      | 54.8   | 58.9    | 56.5 | 70.7  |
|            | 3.125 $\mu\text{g/mL}$     | 75.2   | 77.6    | 75.1 | 86.4  |
|            | 1.56 $\mu\text{g/mL}$      | 92.6   | 96.8    | 94.2 | 100   |
|            | 1.56 $\mu\text{g/mL}$      | 8.2    | 9.3     | 8.1  | 17.6  |

Table S2. Cont.

| Compounds  | Conc. ( $\mu\text{g/mL}$ ) | HepG-2 | HCT-116 | PC3  | MCF-7 |
|------------|----------------------------|--------|---------|------|-------|
| <b>16a</b> | 100 $\mu\text{g/mL}$       | 24.8   | 19.1    | 15.1 | 21.3  |
|            | 50 $\mu\text{g/mL}$        | 36.1   | 26.5    | 24.9 | 30.5  |
|            | 25 $\mu\text{g/mL}$        | 48.2   | 36.4    | 34.3 | 43.7  |
|            | 12.5 $\mu\text{g/mL}$      | 60.5   | 47.2    | 45.6 | 54.8  |
|            | 6.25 $\mu\text{g/mL}$      | 78.6   | 68.4    | 63.7 | 72.9  |
|            | 3.125 $\mu\text{g/mL}$     | 97.4   | 89.6    | 87.0 | 93.1  |
|            | 1.56 $\mu\text{g/mL}$      | 100    | 100     | 100  | 100   |
| <b>16b</b> | 100 $\mu\text{g/mL}$       | 26.8   | 28.6    | 29.8 | 31.9  |
|            | 50 $\mu\text{g/mL}$        | 37.2   | 39.2    | 43.1 | 46.7  |
|            | 25 $\mu\text{g/mL}$        | 49.3   | 52.0    | 53.7 | 56.6  |
|            | 12.5 $\mu\text{g/mL}$      | 60.5   | 63.4    | 71.2 | 72.4  |
|            | 6.25 $\mu\text{g/mL}$      | 75.3   | 77.7    | 84.3 | 85.8  |
|            | 3.125 $\mu\text{g/mL}$     | 94.1   | 95.5    | 97.6 | 100   |
|            | 1.56 $\mu\text{g/mL}$      | 26.8   | 28.6    | 29.8 | 31.9  |
| <b>17a</b> | 100 $\mu\text{g/mL}$       | 50.0   | 45.4    | 49.3 | 49.6  |
|            | 50 $\mu\text{g/mL}$        | 63.7   | 56.3    | 62.2 | 61.5  |
|            | 25 $\mu\text{g/mL}$        | 76.4   | 70.2    | 75.1 | 73.4  |
|            | 12.5 $\mu\text{g/mL}$      | 92.5   | 82.8    | 87.4 | 86.8  |
|            | 6.25 $\mu\text{g/mL}$      | 100    | 97.5    | 100  | 99.3  |
|            | 3.125 $\mu\text{g/mL}$     | 100    | 100     | 100  | 100   |
|            | 1.56 $\mu\text{g/mL}$      | 100    | 100     | 100  | 100   |
| <b>17b</b> | 100 $\mu\text{g/mL}$       | 38.4   | 34.8    | 37.8 | 35.6  |
|            | 50 $\mu\text{g/mL}$        | 51.6   | 47.2    | 54.3 | 48.1  |
|            | 25 $\mu\text{g/mL}$        | 62.2   | 60.3    | 69.1 | 60.2  |
|            | 12.5 $\mu\text{g/mL}$      | 76.5   | 73.0    | 89.4 | 72.5  |
|            | 6.25 $\mu\text{g/mL}$      | 93.1   | 90.6    | 100  | 93.7  |
|            | 3.125 $\mu\text{g/mL}$     | 100    | 100     | 100  | 100   |
|            | 1.56 $\mu\text{g/mL}$      | 100    | 100     | 100  | 100   |
| <b>18a</b> | 100 $\mu\text{g/mL}$       | 20.2   | 16.7    | 18.2 | 14.7  |
|            | 50 $\mu\text{g/mL}$        | 32.0   | 24.6    | 26.0 | 23.9  |
|            | 25 $\mu\text{g/mL}$        | 41.9   | 33.4    | 38.9 | 32.8  |
|            | 12.5 $\mu\text{g/mL}$      | 55.3   | 45.2    | 51.2 | 46.1  |
|            | 6.25 $\mu\text{g/mL}$      | 71.6   | 68.6    | 69.7 | 64.0  |
|            | 3.125 $\mu\text{g/mL}$     | 94.3   | 85.5    | 86.2 | 87.4  |
|            | 1.56 $\mu\text{g/mL}$      | 100    | 100     | 100  | 100   |
| <b>18b</b> | 100 $\mu\text{g/mL}$       | 38.5   | 45.7    | 48.3 | 39.3  |
|            | 50 $\mu\text{g/mL}$        | 54.7   | 56.6    | 60.1 | 54.7  |
|            | 25 $\mu\text{g/mL}$        | 67.3   | 71.3    | 72.9 | 70.8  |
|            | 12.5 $\mu\text{g/mL}$      | 89.6   | 82.8    | 85.2 | 90.9  |
|            | 6.25 $\mu\text{g/mL}$      | 100    | 96.1    | 98.4 | 100   |
|            | 3.125 $\mu\text{g/mL}$     | 100    | 100     | 100  | 100   |
|            | 1.56 $\mu\text{g/mL}$      | 100    | 100     | 100  | 100   |
| <b>19</b>  | 100 $\mu\text{g/mL}$       | 25.4   | 24.1    | 28.1 | 26.3  |
|            | 50 $\mu\text{g/mL}$        | 36.8   | 35.2    | 37.2 | 37.0  |
|            | 25 $\mu\text{g/mL}$        | 47.9   | 46.0    | 50.4 | 49.2  |
|            | 12.5 $\mu\text{g/mL}$      | 59.2   | 57.8    | 62.6 | 60.1  |
|            | 6.25 $\mu\text{g/mL}$      | 77.0   | 70.9    | 83.3 | 75.9  |
|            | 3.125 $\mu\text{g/mL}$     | 94.7   | 91.4    | 97.5 | 92.7  |
|            | 1.56 $\mu\text{g/mL}$      | 100    | 100     | 100  | 100   |
